# Supplementary material
Source: publisher figshare collection journal article supplement (https://tandf.figshare.com/articles/dataset/_/3371152)
Supplement: Supplementary file 3 [file 1]

Archive with 2 entries (2 files):
- Consultation Serrano-Aguilar 2016 .pdf
- Letter of invitation to patients.pdf
